# Supplementary material
Source: MDPI journal article supplement (https://www.mdpi.com/2227-9032/11/9/1338)
Supplement: s1 [file s1]

Archive with 1 entries (1 files):
- healthcare-2298290-supplementary.pdf
