# Supplementary material for: Validation of the Barthel Index as a Predictor of In-Hospital Mortality among COVID-19 Patients
Source: MDPI journal article supplement (doi:10.3390/healthcare11091338), 2023-05-06
Supplement: s1 [file s1 › healthcare-2298290-supplementary.pdf]

## Supplementary material

Supplementary Table S1. Barthel Index Adjusted in the Multivariate Models with age as a continuous variable (Models 2 and 3)

|         | Variable         | Categories     | Reference | p     | OR <sup>a</sup><br>Exp(β) | 95% CI <sup>b</sup> OR Exp(β) |       |
|---------|------------------|----------------|-----------|-------|---------------------------|-------------------------------|-------|
|         |                  |                |           |       |                           | Lower                         | Upper |
| Model 1 | Barthel Index    | >90            | Ref       |       |                           |                               |       |
|         |                  | ≤90            |           | .012  | 2.65                      | 1.24                          | 5.66  |
|         | PSI <sup>c</sup> | <107           | Ref       |       |                           |                               |       |
|         |                  | ≥107           |           | <.001 | 4.20                      | 1.93                          | 9.15  |
|         | SatO2            | >90%           | Ref       |       |                           |                               |       |
| ≤90%    |                  |                | .022      | 2.23  | 1.12                      | 4.44                          |       |
| Model 2 | Barthel Index    | >90            | Ref       |       |                           |                               |       |
|         |                  | ≤90            |           | .021  | 2.55                      | 1.15                          | 5.61  |
|         | Age              | +1 year        |           | .006  | 1.04                      | 1.01                          | 1.08  |
|         |                  | >90%           | Ref       |       |                           |                               |       |
|         | SatO2            | ≤90%           |           | .002  | 2.85                      | 1.47                          | 5.51  |
| Model 3 | Barthel Index    | >90            | Ref       |       |                           |                               |       |
|         |                  | ≤90            |           | .007  | 3.01                      | 1.36                          | 6.70  |
|         | Gender           | Women          | Ref       |       |                           |                               |       |
|         |                  | Men            |           | .043  | 2.03                      | 1.02                          | 4.02  |
|         | Age              | +1 year        |           | .026  | 1.04                      | 1.00                          | 1.07  |
|         |                  | Charlson Index | 0         | Ref   |                           |                               |       |
| ≥1      |                  |                | .053      | 2.21  | 0.99                      | 4.96                          |       |

<sup>a</sup>OR: odds ratio. Exp( $\beta$ ): exponential of beta; <sup>b</sup>95% CI: 95% confidence interval; <sup>c</sup>PSI: Pneumonia Severity Index.

Supplementary Table S2. Areas Under the Curve with their Respective Confidence Intervals (95% CI), Sensitivity, Specificity, Correct Classification and Goodness-of-fit Test for the Models with age as a continuous variable (Models 2 and 3)

| <b>Model</b> | <b>AUC<sup>a</sup><br/>(95% CI)</b> | <b>p</b> | <b>Sens<sup>b</sup> %</b> | <b>Spec<sup>c</sup> %</b> | <b>Correct Classification %<sup>d</sup></b> | <b>Hosmer Lesmeshow (p)</b> |
|--------------|-------------------------------------|----------|---------------------------|---------------------------|---------------------------------------------|-----------------------------|
| <b>1</b>     | .804 (.740-.869)                    | <.001    | 78.4%                     | 72.4%                     | 83.3%                                       | .912                        |
| <b>2</b>     | .792 (.728-.857)                    | <.001    | 86.3%                     | 65.1%                     | 84.6%                                       | .911                        |
| <b>3</b>     | .793 (.729-.857)                    | <.001    | 74,5%                     | 74,3%                     | 83.3%                                       | .834                        |

<sup>a</sup>AUC: Area under the curve; <sup>b</sup>Sens: sensitivity; <sup>c</sup>Spec: specificity. <sup>d</sup>Correct classification: Accuracy or efficiency of the test. 95% CI: 95% confidence interval. Cut-off value .500.

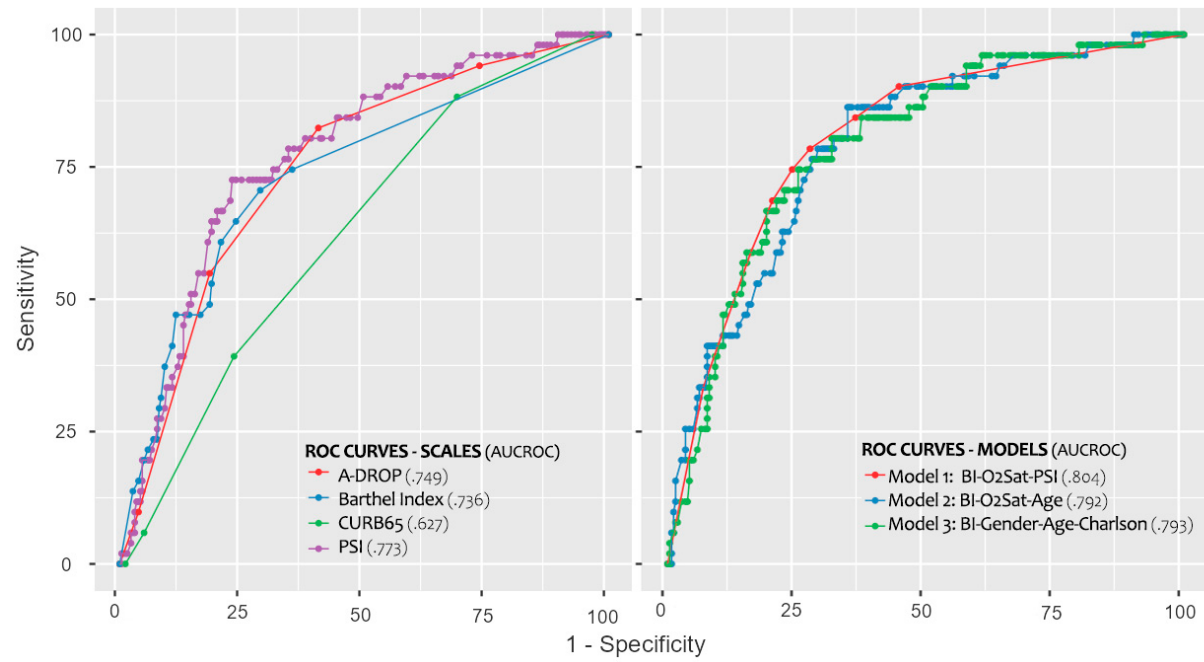

**Supplementary Figure S1.** ROC Curves for the Predictor Scores and the Multivariate Models with age as a continuous variable (Models 2 and 3). (PSI: Pneumonia Severity Index; BI: Barthel index; O2Sat: oxygen saturation).
